# Supplementary material for: Is fasting beneficial for hospitalized patients with inflammatory bowel diseases?
Source: PubMed Central journal article supplement — Intest Res. 2019 Jul 19;18(1):85–95. doi: 10.5217/ir.2019.00055 (PMC7000635; doi:10.5217/ir.2019.00055), 2019-07-19
Supplement: ir-2019-00055-suppl.pdf [file ir-2019-00055-suppl.pdf]

See “Is fasting beneficial for hospitalized patients with inflammatory bowel diseases?” on page 85-95.

**Supplementary Table 1.** Factors Involved in Reducing the CRP Levels (Cox Regression Analysis)

| Variable                      | Univariate analysis |                     | Multivariate analysis |                      |
|-------------------------------|---------------------|---------------------|-----------------------|----------------------|
|                               | P-value             | HR (95% CI)         | P-value               | Adjusted HR (95% CI) |
| Male sex                      | 0.856               | 0.972 (0.713–1.325) | 0.656                 | 1.091 (0.743–1.601)  |
| Age at admission (yr)         | 0.558               | 1.003 (0.993–1.013) | 0.018                 | 0.982 (0.968–0.997)  |
| Hospital stay (day)           | 0.007               | 1.013 (1.003–1.022) | 0.520                 | 1.004 (0.991–1.018)  |
| Diet prescription             |                     |                     |                       |                      |
| Dietary group                 |                     | 1 (reference)       |                       | 1 (reference)        |
| Fasting group                 | 0.469               | 0.893 (0.657–1.213) | 0.213                 | 0.793 (0.551–1.142)  |
| Body weight (kg) at admission | 0.363               | 0.992 (0.976–1.009) | 0.503                 | 1.007 (0.987–1.027)  |
| BMI (kg/m <sup>2</sup> )      | 0.830               | 0.995 (0.948–1.043) |                       |                      |
| Process of admission          |                     |                     |                       |                      |
| Outpatient clinic             |                     | 1 (reference)       |                       | 1 (reference)        |
| Emergency room                | 0.895               | 0.980 (0.722–1.329) | 0.386                 | 1.175 (0.816–1.691)  |
| Type of IBD                   |                     |                     |                       |                      |
| UC                            |                     | 1 (reference)       |                       | 1 (reference)        |
| CD                            | 0.311               | 0.821 (0.560–1.202) | 0.325                 | 0.757 (0.434–1.318)  |
| Intestinal Behçet's disease   | 0.289               | 1.231 (0.839–1.806) | 0.726                 | 1.091 (0.671–1.772)  |
| Underlying disease            |                     |                     |                       |                      |
| Hypertension                  | 0.140               | 1.495 (0.876–2.549) |                       |                      |
| Diabetes                      | 0.392               | 0.714 (0.330–1.545) |                       |                      |
| Hematologic disorder          | 0.039               | 1.490 (1.020–2.176) | 0.378                 | 1.232 (0.775–1.959)  |
| Laboratory findings           |                     |                     |                       |                      |
| Hemoglobin (g/dL)             | 0.005               | 0.917 (0.863–0.975) | 0.971                 | 1.002 (0.919–1.092)  |
| Albumin (g/dL)                | <0.001              | 0.639 (0.510–0.800) | 0.017                 | 0.686 (0.503–0.936)  |
| ESR (mm/hr)                   | <0.001              | 1.009 (1.004–1.013) | 0.004                 | 1.009 (1.003–1.014)  |
| Medications                   |                     |                     |                       |                      |
| 5-ASA                         | 0.995               | 1.001 (0.642–1.562) | 0.598                 | 1.158 (0.671–1.998)  |
| Corticosteroids               | 0.036               | 1.394 (1.021–1.902) | 0.855                 | 1.041 (0.675–1.606)  |
| Immunomodulators              | 0.024               | 0.695 (0.507–0.954) | 0.259                 | 0.796 (0.536–1.183)  |
| Anti-TNF agents               | 0.801               | 1.047 (0.731–1.501) | 0.712                 | 0.921 (0.594–1.428)  |
| Others <sup>a</sup>           | 0.181               | 1.378 (0.861–2.204) | 0.047                 | 1.906 (1.010–3.598)  |
| Nutritional support           |                     |                     | -                     | -                    |
| TPN                           | 0.057               | 1.578 (0.986–2.524) |                       |                      |
| EN                            | 0.737               | 1.086 (0.672–1.753) |                       |                      |

<sup>a</sup>Others: methotrexate, 6-mercaptopurine.

5-ASA, 5-aminosalicylic acid; TPN, total parenteral nutrition; EN, enteral nutrition.
